# Supplementary material for: Exciton diffusion in poly(3-hexylthiophene) by first-principles molecular dynamics
Source: Royal Society of Chemistry journal article supplement (doi:10.1039/d3cp00533j), 2023-01-01
Supplement: d3cp00533j1.pdf [file d3cp00533j1.pdf]

**Supplementary Materials of**  
**“Exciton diffusion in poly(3-hexylthiophene) by first-principles molecular dynamics”**  
**by Cheick Oumar Diarra, Mauro Boero, Emilie Steveler, Thomas Heiser and Evelyne Martin**

CPMD input file

```
&INFO
  Dynamical simulation of first principles dynamics within the ROKS framework
  Exemple of input file
&END

&CPMD
  MOLECULAR DYNAMICS CP
  RESTART WAVEFUNCTION COORDINATES VELOCITIES ACCUMULATORS NOSEE NOSEP
  RESTART LATEST
  ROKS
  DIPOLE DYNAMICS WANNIER SAMPLE
  10
  WANNIER TYPE VANDERBILT
  WANNIER OPTIMIZATION JACOBI
  WANNIER PARAMETER
  0.2 8D-05 0.01 4000
  WANNIER REFERENCE
  1.38 1.632 -1.75
  TIMESTEP
  4.0
  EMASS
  400
  MAXRUNTIME
  86000
  SUBTRACT COMVEL
  1
  SUBTRACT ROTVEL
  1
  NOSE IONS
  300.0 2500
  NOSE ELECTRONS
  0.033 5000.0
  VDW CORRECTION
  TRAJECTORY SAMPLE XYZ
  10
  PRINT FORCES ON
  STORE
  1000
  RESTFILES
  2
  MEMORY BIG ON
  REAL SPACE WFN KEEP
  CENTER MOLECULE ON
&END

&VDW
  EMPIRICAL CORRECTION
  ALL DFT-D3
  FUNCTIONAL
  PBE
  END EMPIRICAL CORRECTION
&END

&DFT
  FUNCTIONAL PBE
  GC-CUTOFF
  1.0E-06
&END

&SYSTEM
  SYMMETRY
  8
  ANGSTROM
  CELL ABSOLUTE
  24.0 16.0 7.6 0 0 0
  CUTOFF
```

70.0  
&END

&ATOMS

\*S\_MT\_PBE.psp KLEINMAN-BYLANDER

LMAX=D

12

|                |              |               |
|----------------|--------------|---------------|
| -10.2136408067 | 3.6087737700 | 3.5741213005  |
| -6.1995997039  | 2.0476096630 | 4.7435065537  |
| -14.1974105074 | 1.8431920180 | 4.4725866485  |
| 5.7294680760   | 3.6323972226 | 3.3897717672  |
| 1.7159778467   | 1.7541088695 | 3.9092215943  |
| -2.2945996545  | 3.5261604278 | 3.0997786822  |
| -14.3353846674 | 3.8998483667 | -0.3761123102 |
| -10.2204816790 | 2.2038238646 | 0.3283770723  |
| 5.7696180146   | 1.9908137135 | 0.5394774404  |
| 1.7437127890   | 3.7857325329 | -0.2696170606 |
| -2.3091197027  | 2.0019788813 | 0.2061304240  |
| -6.2223493451  | 4.0491415203 | -0.3292347651 |

\*C\_MT\_PBE.psp KLEINMAN-BYLANDER

LMAX=P

120

|                |               |              |
|----------------|---------------|--------------|
| -10.0403144029 | 10.7375183267 | 4.5449360330 |
| -10.3107718196 | 9.5566820885  | 3.6453258564 |
| -11.4891644552 | 8.7030749052  | 4.1366760167 |
| -11.6007841997 | 7.2640507343  | 3.5579763807 |
| -12.7872470080 | 6.3474549302  | 3.9369853145 |
| 9.2804498590   | -4.8404037678 | 4.7948246487 |
| 10.2651900489  | -3.7308633879 | 4.0695338759 |
| 9.3759168965   | -2.6994618627 | 3.3173175731 |
| 8.5021740375   | -1.9327321297 | 4.4051240619 |
| 7.5800482311   | -0.8614119660 | 3.8263758247 |
| 5.4644298370   | 10.9070851248 | 4.4323864835 |
| 5.0508741628   | 9.8224566076  | 3.5004459984 |
| 4.4961824840   | 8.6348067039  | 4.2573881132 |
| 4.4390966685   | 7.3358308198  | 3.4834835774 |
| 3.5644322715   | 6.2079530759  | 4.0180835304 |
| -5.7100041795  | -4.1081124969 | 4.4514548939 |
| -6.9301791717  | -3.3442890245 | 4.0556932072 |
| -6.5416985602  | -1.9075538412 | 3.8816124029 |
| -7.3257674545  | -1.0511276033 | 2.9326826748 |
| -8.8523523081  | -0.7938513974 | 3.3009583274 |
| 2.3163432070   | -4.1981410271 | 3.0179502298 |
| 1.3331679559   | -3.9300257886 | 4.1132198143 |
| 0.5693650357   | -2.6859122819 | 3.7865882905 |
| -0.5140680410  | -2.3080523345 | 4.7561070353 |
| -1.4983810691  | -1.2760093883 | 4.3062801231 |
| -3.0368732429  | 9.6756569597  | 3.5016906448 |
| -1.5554079880  | 9.4850332326  | 3.3125702084 |
| -3.8283524002  | 8.5248275068  | 4.2276220942 |
| -3.7272381405  | 7.2391546925  | 3.4903807354 |
| -4.6866758634  | 6.1246649921  | 3.9174767271 |
| -8.9268215914  | -0.0641287678 | 4.7225761585 |
| -11.0972332227 | 1.3504906076  | 4.4150218054 |
| -11.6014336714 | 2.5934247839  | 4.0095307804 |
| -9.7024260376  | 1.2554577584  | 4.4850041265 |
| -9.0170654836  | 2.4446962952  | 4.1612646160 |
| -4.8467057484  | 5.1141731500  | 2.6860411938 |
| -7.6340909492  | 2.8455246828  | 4.0778446574 |
| -7.1238517679  | 3.8943854088  | 3.2230254479 |
| -5.7050400665  | 3.9848677774  | 3.1554990532 |
| -5.0011729912  | 2.8856745747  | 3.7888783145 |
| 3.0669170928   | 5.3729597021  | 2.7616906963 |
| -13.0944525882 | 5.3547632841  | 2.7750590646 |
| -12.9795250837 | 2.8678218674  | 3.7326728203 |
| -13.6716060851 | 4.0626464348  | 3.2597938293 |
| -15.0925825613 | 3.9888562093  | 3.2640003183 |
| -15.6089000942 | 2.8277485625  | 3.8477988250 |
| 7.0962518610   | 0.1027810147  | 4.7899536124 |
| 6.9890433818   | 2.5752182527  | 3.8846094847 |
| 6.3244509234   | 1.3194107663  | 4.3158592140 |
| 4.9105788676   | 1.3234913185  | 4.1826602879 |
| 4.4164824327   | 2.5470088146  | 3.6929805017 |
| 2.9843551910   | 2.8648349721  | 3.5221084129 |
| 2.4083044640   | 4.0710486738  | 3.0959141579 |
| 1.0040969444   | 4.0167183500  | 3.0675710897 |
| 0.3696291652   | 2.8108223835  | 3.4682756948 |

|                |               |               |
|----------------|---------------|---------------|
| -0.7323454129  | -0.0099143159 | 3.9305830584  |
| -3.6259563609  | 2.5104915244  | 3.6735180652  |
| -2.9917472208  | 1.2876225439  | 3.9992203003  |
| -1.5634838102  | 1.1870123867  | 3.7206986058  |
| -1.0185783210  | 2.4217988251  | 3.4316349986  |
| 10.4768743944  | 9.3177599909  | 0.2664925158  |
| 9.0454173026   | 9.6198821667  | 0.7161919245  |
| 8.2748260396   | 8.3925347975  | 1.0170720274  |
| 7.7401886175   | 7.6208217260  | -0.1941257991 |
| 6.9765845300   | 6.3578215354  | 0.2060123901  |
| 6.4341313973   | -3.5680854031 | 1.1573708042  |
| 5.4070420158   | -3.6039812056 | 0.0905951060  |
| 4.7630049660   | -2.2429116240 | -0.1162951596 |
| 3.3003257169   | -2.3186958120 | -0.5149271653 |
| 2.8187698334   | -0.8931904118 | -0.8786458642 |
| 3.0594744044   | 9.0944682332  | -0.2295091205 |
| 1.6491597865   | 9.6820039581  | -0.2491615499 |
| 0.5948457685   | 8.6120531218  | 0.0348787450  |
| 0.5362861955   | 7.4339924651  | -1.0339751674 |
| -0.3248525000  | 6.3388333346  | -0.5150885360 |
| -8.6991439322  | -3.0598625093 | -0.0971844404 |
| -10.2278586876 | -3.1511538482 | -0.1229385693 |
| -11.1143991933 | -1.9232220995 | -0.5296490969 |
| -12.5708872754 | -2.0999800761 | 0.0012101911  |
| -13.3619639679 | -0.8059227164 | -0.0107244275 |
| -2.2356426755  | -4.2451809698 | -0.2002619713 |
| -1.8821365467  | -2.8126909533 | 0.4460454753  |
| -2.8137189893  | -1.7305674863 | 0.0340636166  |
| -4.3516028854  | -2.0075830074 | 0.1378294042  |
| -5.1303904114  | -0.7295849766 | 0.0239781246  |
| -6.6485257957  | 9.8571933328  | -0.1757433674 |
| -6.1135003604  | 10.2720968315 | 1.1782009212  |
| -7.9071380860  | 8.8657058054  | -0.0224030389 |
| -7.4726028457  | 7.4817751312  | 0.5342737136  |
| -8.5002065865  | 6.2777885653  | 0.4916759662  |
| -12.8640952544 | 0.3655610640  | 0.9146752145  |
| -14.9171754536 | 1.6440088528  | 0.6968843951  |
| -15.5630814180 | 2.7854457189  | 0.1649816652  |
| -13.5472839380 | 1.6153151854  | 0.5239989803  |
| -12.9736775571 | 2.8670325568  | 0.1140435274  |
| -8.8341326370  | 5.7089280332  | -0.9130745775 |
| -11.5592315088 | 3.2868057552  | -0.0531520183 |
| -11.0880295616 | 4.4802440953  | -0.6790683689 |
| -9.5989963371  | 4.4976272433  | -0.6112811392 |
| -8.9695741121  | 3.3357208606  | -0.1204347824 |
| -0.7632088202  | 5.2697731117  | -1.5255054578 |
| 6.9572128760   | 5.3993529140  | -1.0097906121 |
| 7.0050372723   | 3.1161122637  | 0.0150085486  |
| 6.2779868381   | 4.1590260912  | -0.6091272565 |
| 4.8455269980   | 4.0918503051  | -0.6098286625 |
| 4.4040001718   | 2.9307095815  | -0.0471000840 |
| 2.9115467111   | -0.0137872614 | 0.2984023440  |
| 3.0254128794   | 2.5032052763  | 0.0003172711  |
| 2.3273506556   | 1.2868592740  | 0.1342164675  |
| 0.9094114513   | 1.4300221900  | 0.1585001567  |
| 0.4119202207   | 2.6895643501  | -0.1188174606 |
| -0.9866228539  | 3.0975690049  | -0.2818056123 |
| -1.5652133800  | 4.2107349327  | -0.9195372705 |
| -2.9596529750  | 4.3126483251  | -0.7255859890 |
| -3.5909208057  | 3.2198192854  | -0.1518429365 |
| -4.8226946741  | 0.4704885033  | 0.9866592712  |
| -7.5395543237  | 2.9938383461  | -0.0121671816 |
| -7.0014492433  | 1.7318996234  | 0.3938869793  |
| -5.5913590476  | 1.6707012529  | 0.5120245928  |
| -4.9779885402  | 2.8821158810  | 0.0299895688  |

\*H\_MT\_PBE.psp KLEINMAN-BYLANDER

LMAX=S

168

|                |              |              |
|----------------|--------------|--------------|
| -11.7612927076 | 0.5450056155 | 4.7286883652 |
| -7.6814378337  | 4.6108121100 | 2.5925341088 |
| -15.7365392103 | 4.8009914943 | 2.9270804716 |
| 4.3553086983   | 0.4870485297 | 4.5858443245 |
| 0.4100211352   | 4.8533043627 | 2.7335668543 |
| -3.6009624771  | 0.4016316734 | 4.1776948583 |
| -10.6052110159 | 9.9171322503 | 2.6327129957 |
| -9.4602397704  | 8.9167400444 | 3.4302680981 |
| -11.3118263800 | 8.5359379815 | 5.2380024327 |

|                |               |               |
|----------------|---------------|---------------|
| -12.4983792195 | 9.1060753428  | 4.2000702658  |
| -11.6451079184 | 7.4145489006  | 2.4917431355  |
| -10.7305657438 | 6.7773769277  | 3.8920115211  |
| -12.3819476011 | 5.7931886614  | 4.7744012172  |
| -13.6075117650 | 6.9519902054  | 4.3474311518  |
| -13.7852677586 | 5.9191533721  | 2.1546468536  |
| -12.2028831145 | 5.1905696106  | 2.1714994662  |
| -9.3375850559  | 11.5095227141 | 4.1318604593  |
| -9.5265145082  | 10.2912803134 | 5.4534507176  |
| -10.9339518313 | 11.3091361049 | 4.8397910192  |
| 10.8069236011  | -3.3005683973 | 4.8517539154  |
| 10.9094157269  | -4.2404284347 | 3.3858751289  |
| 10.0214898375  | -1.9650977252 | 2.7898793032  |
| 8.6413064636   | -3.1473493205 | 2.6692944272  |
| 7.9774432380   | -2.7532329227 | 4.9943813159  |
| 9.0763995873   | -1.5021304071 | 5.1931406714  |
| 8.1278227897   | -0.3303956463 | 2.9734958859  |
| 6.7441016682   | -1.3511675840 | 3.2688095412  |
| 6.5218763044   | -0.4055356708 | 5.6524115544  |
| 7.9896040199   | 0.5173491455  | 5.3952124161  |
| 9.7141981587   | -5.3167107031 | 5.6713230055  |
| 9.0891263918   | -5.6759798220 | 4.1133726376  |
| 8.3087146901   | -4.4037674186 | 4.9098390208  |
| 4.4777094480   | 10.3529610172 | 2.7644680963  |
| 5.9738621166   | 9.5657510108  | 2.9746697295  |
| 5.2356156330   | 8.4478540750  | 5.1232962692  |
| 3.5462528835   | 8.9022146218  | 4.7255214203  |
| 4.1138731427   | 7.6351806116  | 2.4991084639  |
| 5.4514228086   | 6.9291804018  | 3.3590940006  |
| 4.1102916830   | 5.4859803193  | 4.6612011957  |
| 2.7350503928   | 6.7313370424  | 4.5453532366  |
| 2.2936922231   | 5.9438584336  | 2.2230405271  |
| 3.8422304778   | 5.1595429618  | 1.9791144086  |
| 6.0570396797   | 11.6999165081 | 3.9462148867  |
| 6.0004139114   | 10.6059548949 | 5.2910389382  |
| 4.6616558024   | 11.5565070537 | 4.8693502593  |
| -7.3137529376  | -3.6154297213 | 3.0610621828  |
| -7.7650696517  | -3.5063178501 | 4.7567155296  |
| -6.5480801187  | -1.4752205933 | 4.8876805412  |
| -5.4847210120  | -1.8885006038 | 3.5238739180  |
| -6.9240839578  | -0.0073820269 | 3.0245718842  |
| -7.1987915136  | -1.3939132221 | 1.8802667058  |
| -9.1867974092  | 0.0176363966  | 2.6560599300  |
| -9.5190188489  | -1.6582102521 | 3.2439509260  |
| -9.3853159299  | -0.7657835456 | 5.4827657138  |
| -7.8754908431  | 0.1131048678  | 5.0406929157  |
| -5.0795919609  | -3.6856181547 | 5.2539542008  |
| -5.0868277028  | -4.2384483016 | 3.5493581746  |
| -5.9303019050  | -5.1362103663 | 4.7255634698  |
| 0.7572695239   | -4.8451833381 | 4.3228651841  |
| 1.8981831248   | -3.7361398311 | 5.0962750903  |
| 1.3295019903   | -1.8741782438 | 3.7610490373  |
| 0.2756887670   | -2.7626702345 | 2.7278512695  |
| -1.0243633287  | -3.2676561611 | 4.9692914425  |
| -0.0532825280  | -1.9825562524 | 5.7251989023  |
| -2.1799640435  | -1.4762867330 | 3.4963542892  |
| -2.1969742243  | -0.9539908563 | 5.0628244866  |
| -0.0049907000  | 0.1737641689  | 4.7457188203  |
| -0.1399580693  | -0.1330992878 | 2.9894693310  |
| 1.9435285250   | -4.0254168156 | 2.0134517266  |
| 2.8262502028   | -5.1403694753 | 3.0072384417  |
| 3.1545498696   | -3.4499105606 | 3.0817092944  |
| -3.2482529284  | 10.5988688702 | 4.0988139630  |
| -3.5389463796  | 9.7784205664  | 2.5565531309  |
| -3.4284731786  | 8.3533499784  | 5.2467984424  |
| -4.8313864171  | 8.9064142167  | 4.3285310925  |
| -3.8141308074  | 7.5530052964  | 2.4008181184  |
| -2.6460143417  | 6.9600017549  | 3.7394603085  |
| -4.3899059900  | 5.6206719649  | 4.8515334604  |
| -5.6404015289  | 6.6506935412  | 3.9530819043  |
| -5.3355588282  | 5.8054480888  | 1.9697302100  |
| -3.8030255220  | 4.9170534757  | 2.3673974004  |
| -1.1349556901  | 9.0738476696  | 4.2907692553  |
| -0.9479066668  | 10.3693353204 | 3.2164878496  |
| -1.2989085715  | 8.7123148275  | 2.5818814090  |
| -15.4090556045 | 0.8100879166  | 1.1794915519  |
| -11.7605605173 | 5.2736732156  | -1.1075950518 |

|                |               |               |
|----------------|---------------|---------------|
| 4.2121891236   | 4.9187766413  | -0.9244184865 |
| 0.3977137184   | 0.4907607897  | 0.1026676234  |
| -3.5381165771  | 5.1138310045  | -1.1697682506 |
| -7.6279696594  | 0.8389999079  | 0.3746124000  |
| 9.1277770548   | 10.2318843439 | 1.6268241212  |
| 8.4828201657   | 10.2908932742 | 0.0285558345  |
| 8.9412807023   | 7.7089813491  | 1.6156556426  |
| 7.4091809467   | 8.6015680341  | 1.6458914663  |
| 7.1555710520   | 8.3167424039  | -0.7748662057 |
| 8.5321567045   | 7.2868408191  | -0.8798790453 |
| 7.5108624518   | 5.8960148824  | 1.1016814860  |
| 5.9774548627   | 6.5558405774  | 0.6951327860  |
| 6.4902883032   | 5.8548903786  | -1.8591737953 |
| 7.9447716789   | 5.1596318524  | -1.3483653262 |
| 10.4754120093  | 8.7555582364  | -0.6601986396 |
| 11.0944119654  | 8.7139916305  | 0.9836451212  |
| 11.0752424902  | 10.2147546673 | 0.0735458893  |
| 5.7335966819   | -3.9799760739 | -0.8734926274 |
| 4.6159607279   | -4.3510548894 | 0.3706322973  |
| 5.0133334450   | -1.6147129905 | 0.6978098966  |
| 5.2645060548   | -1.6895453845 | -0.9548539879 |
| 3.2649293440   | -3.0534165540 | -1.3933150887 |
| 2.6474937460   | -2.7239348357 | 0.3214310137  |
| 3.2832982629   | -0.5139400870 | -1.7931952270 |
| 1.7927531631   | -0.9548691969 | -1.3026303736 |
| 2.4547802645   | -0.5134668190 | 1.1499231145  |
| 4.0023258174   | 0.1296442200  | 0.5130722193  |
| 6.0978710066   | -2.9901369676 | 1.9810546029  |
| 7.3180062157   | -3.0516777653 | 0.7619499510  |
| 6.7666955038   | -4.5271861138 | 1.4378595462  |
| 1.6493258324   | 10.5372306963 | 0.5116585887  |
| 1.4211773979   | 10.1646352735 | -1.2282910598 |
| 0.8727002681   | 8.3193227401  | 1.0661973125  |
| -0.3930406671  | 8.9774758774  | 0.0610234379  |
| 0.3114706246   | 7.7617286710  | -2.0222576422 |
| 1.5020528078   | 6.9894708936  | -1.0732093730 |
| 0.2353391315   | 5.8992043935  | 0.3115193094  |
| -1.2006410385  | 6.6063068529  | 0.0663391445  |
| -1.2372945132  | 5.8123453413  | -2.4015312616 |
| 0.1571859523   | 4.7869211416  | -1.9301535854 |
| 3.7409773176   | 9.9364301056  | -0.4169708896 |
| 3.1947539979   | 8.3547228168  | -1.0448615290 |
| 3.3522695691   | 8.6082793219  | 0.7322560032  |
| -10.4109548895 | -3.9379444692 | -0.8471618127 |
| -10.6152048156 | -3.5144390191 | 0.8360039741  |
| -10.6741467609 | -1.0471303710 | -0.0838925283 |
| -11.2546124312 | -1.8799202983 | -1.6499022200 |
| -13.1464912448 | -2.8782070229 | -0.5049309520 |
| -12.4690717428 | -2.4128272639 | 1.0747069783  |
| -13.5100025891 | -0.3260628790 | -0.9974634483 |
| -14.3659252458 | -1.0343721277 | 0.3880819131  |
| -13.0912438347 | 0.1298014729  | 1.9794308940  |
| -11.7424877154 | 0.4350369601  | 0.8377595225  |
| -8.3783233923  | -2.4798175221 | 0.7949946639  |
| -8.3122266602  | -2.5768439680 | -1.0483491382 |
| -8.3640512987  | -4.0820375851 | -0.0179270586 |
| -2.1518256751  | -3.0042160330 | 1.5285184189  |
| -0.7976756156  | -2.6133233928 | 0.5386425009  |
| -2.4946368431  | -0.7533050069 | 0.3607131769  |
| -2.6848806677  | -1.5593631303 | -1.0843939079 |
| -4.7407248332  | -2.6441721715 | -0.6263468774 |
| -4.7041029533  | -2.4879066226 | 1.0868178934  |
| -4.9015668213  | -0.3258694376 | -0.9946644040 |
| -6.2336257730  | -0.9759470660 | -0.0441268770 |
| -5.1478722245  | 0.2843926671  | 2.0199076581  |
| -3.7450302164  | 0.6680834305  | 0.9364613555  |
| -2.3691343300  | -4.1953195647 | -1.2725574369 |
| -3.1414203024  | -4.4907832260 | 0.3977230684  |
| -1.4931516186  | -5.0531440801 | 0.0303211635  |
| -6.8777817390  | 10.6820055403 | -0.7599032356 |
| -5.7700745546  | 9.3960616448  | -0.7895896368 |
| -8.6927606926  | 9.2949172586  | 0.6458006772  |
| -8.4914676494  | 8.6861907890  | -0.9531918395 |
| -6.5753283167  | 7.2591237664  | -0.0582738997 |
| -7.2423145512  | 7.6565209248  | 1.6267711078  |
| -8.1390484181  | 5.5298977308  | 1.1820550531  |
| -9.4661863086  | 6.6505724705  | 1.0095004219  |

|               |               |               |
|---------------|---------------|---------------|
| -9.4126034175 | 6.4388394806  | -1.4947314446 |
| -7.9136022798 | 5.4712843271  | -1.4339309038 |
| -5.3184333154 | 9.6152771510  | 1.5205733410  |
| -6.9173010099 | 10.2998169348 | 1.9425445627  |
| -5.6416075575 | 11.2700834636 | 1.0805672193  |

&END
